# Supplementary material for: Ocular Tolerability and Immune Response to Corneal Intrastromal AAV-IDUA Gene Therapy in New Zealand White Rabbits
Source: PubMed Central journal article supplement — Mol Ther Methods Clin Dev. 2020 May 22;18:24–32. doi: 10.1016/j.omtm.2020.05.014 (PMC7284066; doi:10.1016/j.omtm.2020.05.014), 2020-05-22

**OMTM, Volume 18**

**Supplemental Information**

**Ocular Tolerability and Immune Response  
to Corneal Intrastromal AAV-*IDUA* Gene  
Therapy in New Zealand White Rabbits**

**Liujiang Song, Jacquelyn J. Bower, Telmo Llanga, Jacklyn H. Salmon, Matthew L. Hirsch, and Brian C. Gilger**

**Supplemental Table 1. Injection observations.**

| Treatment            | Rabbit #    | Corneal surface leakage (None, Mild, Moderate, Severe) | Anterior chamber perforation (Y/N) | Number of injection attempts |
|----------------------|-------------|--------------------------------------------------------|------------------------------------|------------------------------|
| Saline               | 1           | 2                                                      | N                                  | 3                            |
|                      | 2           | 1                                                      | N                                  | 1                            |
|                      | 3           | 0                                                      | N                                  | 1                            |
|                      | 4           | 1                                                      | N                                  | 2                            |
|                      | 5           | 1                                                      | N                                  | 1                            |
|                      | 6           | 1                                                      | N                                  | 1                            |
| AAV-IDUAe9           | 1           | 1                                                      | N                                  | 1                            |
|                      | 2           | 1                                                      | N                                  | 1                            |
|                      | 3           | 1                                                      | N                                  | 1                            |
|                      | 4           | 0                                                      | N                                  | 1                            |
|                      | 6           | 0                                                      | N                                  | 1                            |
|                      | 7           | 1                                                      | N                                  | 1                            |
|                      | 8           | 1                                                      | N                                  | 1                            |
|                      | AAV-IDUAe10 | 1                                                      | 1                                  | N                            |
| 2                    |             | 1                                                      | N                                  | 1                            |
| 3                    |             | 0                                                      | N                                  | 1                            |
| 4                    |             | 1                                                      | N                                  | 1                            |
| 5                    |             | 1                                                      | N                                  | 1                            |
| 6                    |             | 1                                                      | N                                  | 1                            |
| 7                    |             | 0                                                      | N                                  | 1                            |
| 8                    |             | 1                                                      | N                                  | 1                            |
| <b>Total Numbers</b> | N=22        | 15/22 rabbits had none or mild leakage                 | 0/22 perforations                  | 19/22 were single injections |

Note: The Right eye was injected with either 50 uL of saline (n=6), AAV-opt-IDUAe9 (n=8), or AAV-opt-IDUAe10 (n=8) using a 31 gauge needle. Most eyes had mild injection site surface leakage but there were no anterior chamber perforations. Most stromal injections could be done with a single needle insertion, but in 3 cases, 2 - 3 needle injections had to be used to ensure a stromal injection.

**Supplementary Table 2. Serum Chemistries and Complete Blood Counts**

| Study month                    | Rabbit # | Group  | Serum chemistries |             |            |           |           |            |            |                          |                         |                          |               | Complete blood count       |                            |             |         |
|--------------------------------|----------|--------|-------------------|-------------|------------|-----------|-----------|------------|------------|--------------------------|-------------------------|--------------------------|---------------|----------------------------|----------------------------|-------------|---------|
|                                |          |        | Glu (mg/dl)       | BUN (mg/dl) | Cr (mg/dl) | TP (g/dl) | AP (IU/L) | ALT (IU/L) | AST (IU/L) | Na <sup>+</sup> (mmol/L) | K <sup>+</sup> (mmol/L) | Cl <sup>-</sup> (mmol/L) | Lipase (IU/L) | WBC (x10 <sup>9</sup> /UL) | RBC (x10 <sup>9</sup> /UL) | Hemo (g/dl) | HCT (%) |
| <i>Rabbit reference range:</i> |          |        |                   |             |            |           |           |            |            |                          |                         |                          |               |                            |                            |             |         |
| 0                              | 25       | Saline | 115               | 20          | 1.0        | 4.7       | 79        | 20         | 14         | 147                      | 4.6                     | 101                      | 235           | 5.63                       | 6.72                       | 14.3        | 41.6    |
| 1                              | 25       | Saline | 112               | 21          | 1.1        | 5.3       | 59        | 60         | 38         | 146                      | 4.7                     | 102                      | 255           | 6.41                       | 6.73                       | 14.4        | 42.3    |
| 2                              | 25       | Saline | 135               | 21          | 1.1        | 5.3       | 47        | 43         | 16         | 146                      | 4.7                     | 102                      | 251           | 6.59                       | 6.98                       | 15.1        | 43.5    |
| 3                              | 25       | Saline | 90                | 21          | 1.0        | 5.5       | 46        | 23         | 13         | 141                      | 4.4                     | 104                      | 271           | 6.50                       | 6.64                       | 14.5        | 42.0    |
| 4                              | 25       | Saline | 116               | 18          | 0.8        | 5.3       | 29        | 33         | 16         | 144                      | 4.6                     | 109                      | 220           | 4.54                       | 6.64                       | 14.6        | 42.3    |
| 0                              | 29       | Saline | 138               | 17          | 0.8        | 4.6       | 65        | 25         | 12         | 146                      | 4.3                     | 103                      | 162           | 5.80                       | 6.24                       | 13.3        | 39.2    |
| 1                              | 29       | Saline | 117               | 19          | 1.2        | 5.6       | 42        | 50         | 28         | 149                      | 5.0                     | 102                      | 184           | 5.93                       | 6.69                       | 14.6        | 43.5    |
| 2                              | 29       | Saline | 155               | 19          | 1.0        | 5.0       | 27        | 86         | 23         | 143                      | 5.1                     | 106                      | 185           | 5.34                       | 6.02                       | 13.1        | 38.0    |
| 3                              | 29       | Saline | 107               | 19          | 0.9        | 5.5       | 26        | 48         | 26         | 146                      | 4.6                     | 107                      | 167           | 5.04                       | 6.06                       | 13.4        | 39.0    |
| 4                              | 29       | Saline | 145               | 14          | 0.6        | 5.6       | 19        | 37         | 12         | 142                      | 4.7                     | 108                      | 186           | X                          | X                          | X           | X       |
| 0                              | 33       | Saline | 148               | 14          | 0.8        | 4.8       | 59        | 52         | 28         | 146                      | 4.6                     | 103                      | 229           | X                          | X                          | X           | X       |
| 1                              | 33       | Saline | 128               | 14          | 0.8        | 4.9       | 45        | 53         | 29         | 145                      | 4.6                     | 103                      | 231           | 6.82                       | 6.48                       | 13.2        | 39.4    |
| 2                              | 33       | Saline | 136               | 16          | 0.7        | 5.2       | 53        | 52         | 17         | 141                      | 5.0                     | 105                      | 230           | 8.39                       | 6.78                       | 14.1        | 41.2    |
| 3                              | 33       | Saline | 122               | 13          | 0.7        | 5.4       | 66        | 55         | 41         | 142                      | 4.2                     | 104                      | 266           | 8.18                       | 6.67                       | 14.1        | 41.2    |
| 4                              | 33       | Saline | 140               | 13          | 0.7        | 5.4       | 30        | 40         | 15         | 142                      | 4.5                     | 109                      | 210           | 5.88                       | 6.66                       | 14.2        | 41.3    |
| 0                              | 37       | Saline | 161               | 18          | 1.0        | 4.5       | 60        | 27         | 11         | 144                      | 4.6                     | 100                      | 225           | X                          | X                          | X           | X       |
| 1                              | 37       | Saline | 237               | 17          | 1.1        | 4.8       | 53        | 34         | 18         | 144                      | 4.8                     | 103                      | 230           | 6.98                       | 6.13                       | 13.2        | 38.4    |
| 2                              | 37       | Saline | 150               | 24          | 1.1        | 5.2       | 40        | 38         | 26         | 141                      | 4.9                     | 106                      | 276           | X                          | X                          | X           | X       |
| 3                              | 37       | Saline | 114               | 23          | 1.0        | 5.5       | 52        | 41         | 18         | 139                      | 5.1                     | 106                      | 391           | 7.58                       | 6.28                       | 14.1        | 40.9    |
| 4                              | 37       | Saline | 141               | 18          | 0.9        | 5.4       | 35        | 36         | 12         | 140                      | 4.8                     | 107                      | 287           | 6.39                       | 6.13                       | 14.0        | 39.2    |
| 0                              | 41       | Saline | 123               | 22          | 1.1        | 4.9       | 79        | 34         | 20         | 148                      | 4.7                     | 102                      | 227           | 8.77                       | 6.78                       | 14.9        | 42.9    |
| 1                              | 41       | Saline | 117               | 24          | 1.1        | 5.1       | 36        | 28         | 22         | 147                      | 5.2                     | 101                      | 259           | X                          | X                          | X           | X       |
| 2                              | 41       | Saline | 123               | 22          | 0.8        | 5.0       | 30        | 27         | 13         | 142                      | 4.6                     | 105                      | 250           | X                          | X                          | X           | X       |
| 3                              | 41       | Saline | 124               | 23          | 0.9        | 5.4       | 25        | 27         | 13         | 145                      | 4.2                     | 106                      | 357           | 7.48                       | 6.46                       | 14.5        | 41.6    |
| 4                              | 41       | Saline | 117               | 21          | 0.8        | 5.2       | 25        | 26         | 13         | 142                      | 4.9                     | 109                      | 271           | 8.09                       | 6.56                       | 14.8        | 42.2    |
| 0                              | 45       | Saline | 150               | 17          | 0.8        | 4.5       | 90        | 22         | 14         | 144                      | 4.1                     | 102                      | 164           | X                          | X                          | X           | X       |
| 1                              | 45       | Saline | 105               | 21          | 0.8        | 4.8       | 58        | 35         | 22         | 145                      | 4.6                     | 106                      | 190           | X                          | X                          | X           | X       |
| 2                              | 45       | Saline | 155               | 22          | 0.9        | 4.7       | 50        | 46         | 22         | 145                      | 4.6                     | 109                      | 208           | 5.67                       | 6.49                       | 13.2        | 38.1    |
| 3                              | 45       | Saline | 130               | 22          | 0.9        | 5.2       | 45        | 44         | 36         | 143                      | 4.5                     | 107                      | 245           | 4.94                       | 6.82                       | 14.2        | 40.8    |
| 4                              | 45       | Saline | 137               | 17          | 0.8        | 5.1       | 33        | 32         | 18         | 141                      | 5.2                     | 110                      | 218           | 4.78                       | 6.73                       | 14.1        | 40.2    |
| 0                              | 26       | Low    | 124               | 16          | 0.9        | 4.8       | 126       | 13         | 9          | 148                      | 3.9                     | 101                      | 280           | X                          | X                          | X           | X       |
| 1                              | 26       | Low    | 105               | 17          | 0.8        | 5.1       | 89        | 21         | 11         | 148                      | 4.3                     | 104                      | 276           | 7.55                       | 6.23                       | 13.2        | 38.6    |
| 2                              | 26       | Low    | 140               | 18          | 1.0        | 5.3       | 113       | 18         | 11         | 144                      | 4.6                     | 104                      | 393           | X                          | X                          | X           | X       |
| 3                              | 26       | Low    | 99                | 19          | 0.9        | 5.5       | 64        | 28         | 18         | 145                      | 4.2                     | 104                      | 430           | 7.26                       | 6.22                       | 13.4        | 39.0    |
| 4                              | 26       | Low    | 125               | 16          | 0.8        | 5.5       | 55        | 22         | 11         | 143                      | 4.0                     | 106                      | 362           | 5.53                       | 5.87                       | 12.7        | 36.8    |
| 0                              | 30       | Low    | 148               | 16          | 0.7        | 4.7       | 123       | 25         | 13         | 144                      | 4.2                     | 103                      | 334           | 5.44                       | 6.64                       | 13.9        | 39.9    |

|   |    |      |     |    |     |     |    |     |     |     |     |     |     |      |      |      |      |
|---|----|------|-----|----|-----|-----|----|-----|-----|-----|-----|-----|-----|------|------|------|------|
| 1 | 30 | Low  | X   | X  | X   | X   | X  | X   | X   | X   | X   | X   | X   | X    | X    | X    | X    |
| 2 | 30 | Low  | 144 | 18 | 0.7 | 5.5 | 74 | 46  | 17  | 146 | 4.5 | 108 | 182 | X    | X    | X    | X    |
| 3 | 30 | Low  | 139 | 18 | 0.7 | 5.4 | 64 | 30  | 20  | 144 | 4.6 | 104 | 189 | 5.37 | 6.81 | 14.3 | 42.0 |
| 4 | 30 | Low  | 142 | 14 | 0.6 | 5.7 | 44 | 29  | 13  | 143 | 4.5 | 107 | 166 | 4.63 | 6.62 | 14.0 | 40.8 |
| 0 | 34 | Low  | 123 | 22 | 0.9 | 4.4 | 31 | 38  | 19  | 146 | 5.0 | 104 | 128 | 4.99 | 6.10 | 12.6 | 36.8 |
| 1 | 34 | Low  | 90  | 19 | 0.9 | 4.8 | 28 | 47  | 28  | 148 | 4.6 | 106 | 171 | 5.16 | 5.68 | 11.9 | 35.3 |
| 2 | 34 | Low  | 134 | 26 | 1.0 | 5.0 | 26 | 43  | 17  | 146 | 4.0 | 106 | 196 | X    | X    | X    | X    |
| 3 | 34 | Low  | 112 | 21 | 1.0 | 5.5 | 17 | 36  | 14  | 145 | 4.3 | 108 | 173 | 4.73 | 6.05 | 12.8 | 38.4 |
| 4 | 34 | Low  | 124 | 20 | 0.9 | 5.0 | 20 | 31  | 9   | 142 | 4.3 | 109 | 193 | X    | X    | X    | X    |
| 0 | 38 | Low  | 112 | 19 | 1.1 | 4.8 | 32 | 16  | 11  | 147 | 4.4 | 102 | 228 | 6.42 | 6.40 | 13.2 | 39.1 |
| 1 | 38 | Low  | 173 | 21 | 1.2 | 5.0 | 27 | 22  | 17  | 147 | 4.4 | 102 | 256 | 5.77 | 6.36 | 13.1 | 38.6 |
| 2 | 38 | Low  | 143 | 21 | 1.3 | 5.1 | 25 | 14  | 16  | 144 | 4.1 | 99  | 264 | 7.02 | 6.17 | 12.8 | 37.1 |
| 3 | 38 | Low  | 152 | 22 | 1.2 | 5.0 | 25 | 23  | 21  | 143 | 4.3 | 103 | 362 | 6.82 | 5.93 | 12.4 | 36.5 |
| 4 | 38 | Low  | 126 | 21 | 1.1 | 5.2 | 23 | 16  | 15  | 143 | 4.5 | 106 | 289 | 6.96 | 6.18 | 13.2 | 38.1 |
| 0 | 42 | Low  | 113 | 16 | 0.9 | 5.0 | 80 | 61  | 23  | 146 | 4.5 | 100 | 271 | 6.11 | 5.93 | 12.9 | 38.3 |
| 1 | 42 | Low  | 106 | 21 | 1.0 | 5.2 | 50 | 25  | 17  | 145 | 4.9 | 103 | 219 | 6.47 | 5.96 | 12.8 | 38.1 |
| 2 | 42 | Low  | 139 | 21 | 0.8 | 5.0 | 38 | 54  | 13  | 142 | 4.4 | 105 | 202 | 5.89 | 5.65 | 12.4 | 36.7 |
| 3 | 42 | Low  | 136 | 21 | 1.0 | 5.5 | 35 | 26  | 11  | 144 | 4.1 | 103 | 259 | 6.64 | 5.75 | 12.8 | 37.5 |
| 4 | 42 | Low  | 132 | 22 | 1.1 | 5.7 | 30 | 47  | 20  | 144 | 4.5 | 106 | 263 | 6.57 | 5.66 | 12.7 | 37.5 |
| 0 | 46 | Low  | 182 | 15 | 0.9 | 4.7 | 79 | 19  | 14  | 144 | 4.2 | 99  | 208 | 6.19 | 6.62 | 14.1 | 40.2 |
| 1 | 46 | Low  | 136 | 17 | 0.9 | 4.9 | 73 | 25  | 17  | 142 | 4.9 | 105 | 217 | 7.68 | 6.67 | 14.1 | 41.5 |
| 2 | 46 | Low  | 140 | 16 | 0.7 | 5.1 | 57 | 32  | 41  | 143 | 4.5 | 106 | 224 | 7.13 | 6.74 | 14.2 | 41.7 |
| 3 | 46 | Low  | 180 | 15 | 0.8 | 5.2 | 52 | 33  | 34  | 143 | 4.5 | 105 | 243 | 6.26 | 6.56 | 13.9 | 41.1 |
| 4 | 46 | Low  | 145 | 15 | 0.7 | 5.3 | 51 | 19  | 33  | 140 | 4.9 | 109 | 249 | X    | X    | X    | X    |
| 0 | 49 | Low  | 149 | 14 | 0.9 | 4.7 | 42 | 24  | 22  | 147 | 4.2 | 101 | 159 | 7.88 | 6.87 | 14.3 | 40.9 |
| 1 | 49 | Low  | 122 | 16 | 0.9 | 5.1 | 41 | 22  | 16  | 142 | 4.8 | 105 | 378 | 9.07 | 6.79 | 13.9 | 40.5 |
| 2 | 49 | Low  | 139 | 18 | 0.8 | 5.0 | 33 | 35  | 45  | 141 | 5.2 | 106 | 207 | 8.20 | 6.67 | 13.9 | 40.2 |
| 3 | 49 | Low  | 182 | 15 | 0.9 | 5.2 | 32 | 35  | 35  | 144 | 4.1 | 104 | 228 | 6.96 | 6.55 | 13.9 | 39.9 |
| 4 | 49 | Low  | 140 | 18 | 1.0 | 5.1 | 27 | 22  | 16  | 141 | 4.6 | 107 | 231 | 6.28 | 6.77 | 14.5 | 41.5 |
| 0 | 53 | Low  | 198 | 13 | 1.0 | 4.6 | 61 | 27  | 14  | 145 | 4.5 | 99  | 243 | 5.41 | 6.74 | 14.1 | 40.7 |
| 1 | 53 | Low  | 140 | 19 | 1.1 | 5.3 | 47 | 25  | 13  | 144 | 5.0 | 104 | 271 | 6.97 | 6.66 | 14.1 | 40.8 |
| 2 | 53 | Low  | 146 | 21 | 0.9 | 5.4 | 37 | 21  | 12  | 143 | 4.7 | 102 | 297 | 6.38 | 6.69 | 14.6 | 41.9 |
| 3 | 53 | Low  | 136 | 21 | 0.8 | 5.7 | 41 | 18  | 9   | 142 | 4.5 | 105 | 391 | X    | X    | X    | X    |
| 4 | 53 | Low  | 146 | 24 | 0.9 | 5.7 | 32 | 19  | 7   | 141 | 4.6 | 103 | 424 | 5.80 | 6.58 | 14.5 | 41.1 |
| 0 | 31 | High | 132 | 15 | 0.9 | 4.5 | 51 | 16  | 22  | 145 | 4.3 | 101 | 237 | 6.15 | 6.78 | 14.6 | 42.4 |
| 1 | 31 | High | 118 | 15 | 0.9 | 5.0 | 36 | 19  | 16  | 146 | 4.5 | 105 | 291 | 7.24 | 6.39 | 13.6 | 39.7 |
| 2 | 31 | High | 132 | 16 | 0.9 | 4.9 | 33 | 19  | 10  | 140 | 4.7 | 104 | 272 | 7.48 | 6.45 | 13.9 | 40.2 |
| 3 | 31 | High | 107 | 18 | 0.9 | 5.4 | 26 | 19  | 11  | 143 | 4.2 | 106 | 372 | 6.40 | 6.63 | 14.5 | 42.3 |
| 4 | 31 | High | 135 | 15 | 0.9 | 5.1 | 21 | 18  | 12  | 141 | 4.2 | 106 | 237 | X    | X    | X    | X    |
| 0 | 35 | High | 170 | 22 | 1.0 | 5.2 | 27 | 44  | 29  | 145 | 4.5 | 99  | 216 | 5.42 | 6.07 | 13.1 | 37.9 |
| 1 | 35 | High | 149 | 18 | 1.2 | 5.2 | 27 | 67  | 59  | 144 | 4.9 | 99  | 227 | 5.78 | 5.90 | 12.7 | 37.6 |
| 2 | 35 | High | 134 | 22 | 1.0 | 5.4 | 32 | 122 | 411 | 141 | 4.4 | 103 | 228 | 8.01 | 6.2  | 13.8 | 39.3 |

|   |    |      |     |    |     |     |    |    |    |     |     |     |     |      |      |      |      |
|---|----|------|-----|----|-----|-----|----|----|----|-----|-----|-----|-----|------|------|------|------|
| 3 | 35 | High | 120 | 17 | 1.0 | 5.5 | 24 | 29 | 23 | 143 | 4.4 | 104 | 250 | X    | X    | X    | X    |
| 4 | 35 | High | 135 | 21 | 1.0 | 5.4 | 18 | 37 | 17 | 140 | 4.4 | 105 | 241 | X    | X    | X    | X    |
| 0 | 39 | High | 146 | 18 | 0.7 | 5.0 | 36 | 25 | 17 | 147 | 4.1 | 103 | 174 | 5.04 | 6.51 | 13.1 | 38.7 |
| 1 | 39 | High | 189 | 18 | 0.8 | 5.0 | 33 | 43 | 29 | 146 | 4.2 | 103 | 170 | 4.19 | 6.76 | 13.8 | 40.1 |
| 2 | 39 | High | 130 | 15 | 1.2 | 5.2 | 45 | 33 | 23 | 143 | 3.9 | 104 | 146 | 4.16 | 6.72 | 13.6 | 39.3 |
| 3 | 39 | High | 115 | 20 | 0.9 | 5.2 | 39 | 27 | 19 | 144 | 4.2 | 107 | 219 | 4.06 | 6.61 | 13.6 | 39.9 |
| 4 | 39 | High | 138 | 15 | 0.7 | 5.4 | 29 | 22 | 11 | 143 | 4.3 | 108 | 171 | 4.27 | 6.43 | 13.6 | 39.1 |
| 0 | 43 | High | 161 | 16 | 0.8 | 4.8 | 33 | 17 | 13 | 147 | 4.5 | 103 | 155 | 6.92 | 6.01 | 13.4 | 38.9 |
| 1 | 43 | High | 117 | 18 | 0.9 | 5.1 | 28 | 19 | 14 | 146 | 5.5 | 104 | 179 | 8.57 | 6.06 | 13.4 | 39.2 |
| 2 | 43 | High | 124 | 20 | 0.7 | 5.0 | 23 | 18 | 15 | 144 | 4.8 | 108 | 171 | 8.26 | 5.70 | 12.8 | 37.2 |
| 3 | 43 | High | 120 | 20 | 0.7 | 5.4 | 21 | 21 | 10 | 144 | 4.3 | 109 | 207 | 6.53 | 5.74 | 13.2 | 37.9 |
| 4 | 43 | High | 137 | 20 | 0.8 | 5.6 | 17 | 17 | 11 | 143 | 4.6 | 108 | 191 | 6.27 | 5.78 | 13.2 | 37.9 |
| 0 | 47 | High | 165 | 18 | 0.8 | 5.2 | 71 | 26 | 17 | 146 | 4.2 | 102 | 169 | 5.60 | 6.18 | 12.5 | 37.7 |
| 1 | 47 | High | 136 | 17 | 0.7 | 5.0 | 47 | 31 | 13 | 144 | 5.1 | 108 | 196 | 7.27 | 5.84 | 11.8 | 36.0 |
| 2 | 47 | High | 126 | 20 | 0.8 | 5.0 | 38 | 34 | 11 | 143 | 4.7 | 107 | 204 | 7.54 | 5.82 | 11.9 | 36.0 |
| 3 | 47 | High | 146 | 20 | 0.7 | 5.8 | 33 | 22 | 10 | 144 | 4.6 | 108 | 187 | 6.70 | 5.77 | 11.8 | 36.3 |
| 4 | 47 | High | 136 | 20 | 0.8 | 5.7 | 24 | 22 | 9  | 142 | 5.0 | 107 | 218 | 7.11 | 5.74 | 12.1 | 35.7 |
| 0 | 51 | High | 139 | 20 | 0.8 | 4.5 | 84 | 48 | 32 | 144 | 4.6 | 103 | 213 | 7.55 | 6.09 | 12.3 | 36.1 |
| 1 | 51 | High | 131 | 24 | 0.8 | 4.9 | 61 | 40 | 21 | 144 | 5.2 | 107 | 238 | 6.09 | 6.29 | 12.6 | 37.0 |
| 2 | 51 | High | 135 | 26 | 0.9 | 5.0 | 46 | 59 | 26 | 142 | 4.7 | 107 | 268 | 7.61 | 6.22 | 12.8 | 37.0 |
| 3 | 51 | High | 135 | 25 | 0.8 | 5.4 | 47 | 32 | 17 | 143 | 4.7 | 110 | 252 | X    | X    | X    | X    |
| 4 | 51 | High | 132 | 25 | 0.9 | 5.4 | 28 | 34 | 23 | 143 | 5.2 | 110 | 297 | 6.61 | 6.35 | 13.4 | 38.7 |
| 0 | 54 | High | 171 | 17 | 0.9 | 5.1 | 72 | 23 | 17 | 146 | 4.7 | 96  | 170 | 4.87 | 6.34 | 13.0 | 37.4 |
| 1 | 54 | High | 134 | 20 | 1.0 | 5.4 | 56 | 28 | 18 | 142 | 5.4 | 103 | 182 | 7.18 | 6.47 | 13.4 | 38.8 |
| 2 | 54 | High | 137 | 18 | 0.8 | 5.5 | 37 | 29 | 14 | 140 | 5.2 | 99  | 195 | X    | X    | X    | X    |
| 3 | 54 | High | 142 | 21 | 0.9 | 6.2 | 42 | 27 | 18 | 141 | 5.4 | 101 | 245 | 6.2  | 6.43 | 13.8 | 40.0 |
| 4 | 54 | High | 140 | 20 | 0.9 | 5.9 | 32 | 22 | 13 | 142 | 5.1 | 103 | 238 | X    | X    | X    | X    |

Glu – glucose; BUN – blood urea nitrogen; Cr – Creatinine; TP – Total protein; AP – alkaline phosphatase; ALT - alanine aminotransferase; AST - Aspartate Aminotransferase; Na<sup>+</sup> - Sodium; K<sup>+</sup> - potassium; Cl<sup>-</sup> - Chloride; WBC – white blood cell count; RBC – red blood cell count; Hemo – hemoglobin; HCT - hematocrit

**X – data not available**

**Supplementary Table 3. Serum Neutralizing Antibody at day 176**

| Rabbit # | Treatment | Titer       | Rabbit # | Treatment | Titer |
|----------|-----------|-------------|----------|-----------|-------|
| 25       | Saline    | None        | 46       | IDUAe9    | None  |
| 29       | Saline    | None        | 49       | IDUAe9    | None  |
| 33       | Saline    | None        | 53       | IDUAe9    | None  |
| 37       | Saline    | None        | 27       | IDAUE10   | None  |
| 41       | Saline    | None        | 31       | IDAUE10   | None  |
| 45       | Saline    | None        | 35       | IDAUE10   | None  |
| 26       | IDUAe9    | None        | 39       | IDAUE10   | None  |
| 30       | IDUAe9    | None        | 43       | IDAUE10   | None  |
| 34       | IDUAe9    | None        | 47       | IDAUE10   | None  |
| 38       | IDUAe9    | 0.043055556 | 51       | IDAUE10   | None  |
| 42       | IDUAe9    | None        | 54       | IDAUE10   | None  |

Note: Neutralizing antibodies (NAB) to the viral capsid 176 days following corneal intrastromal injection. There was also no NAB in the aqueous or vitreous humor of eyes injected with saline, IDUAe9, or IDUAe10.

**Supplemental Figure 1.** Representative optical coherence tomography images of the right and left corneas 176 days after intrastromal injection of AAV-IDUA.

**Supplementary Figure 1**

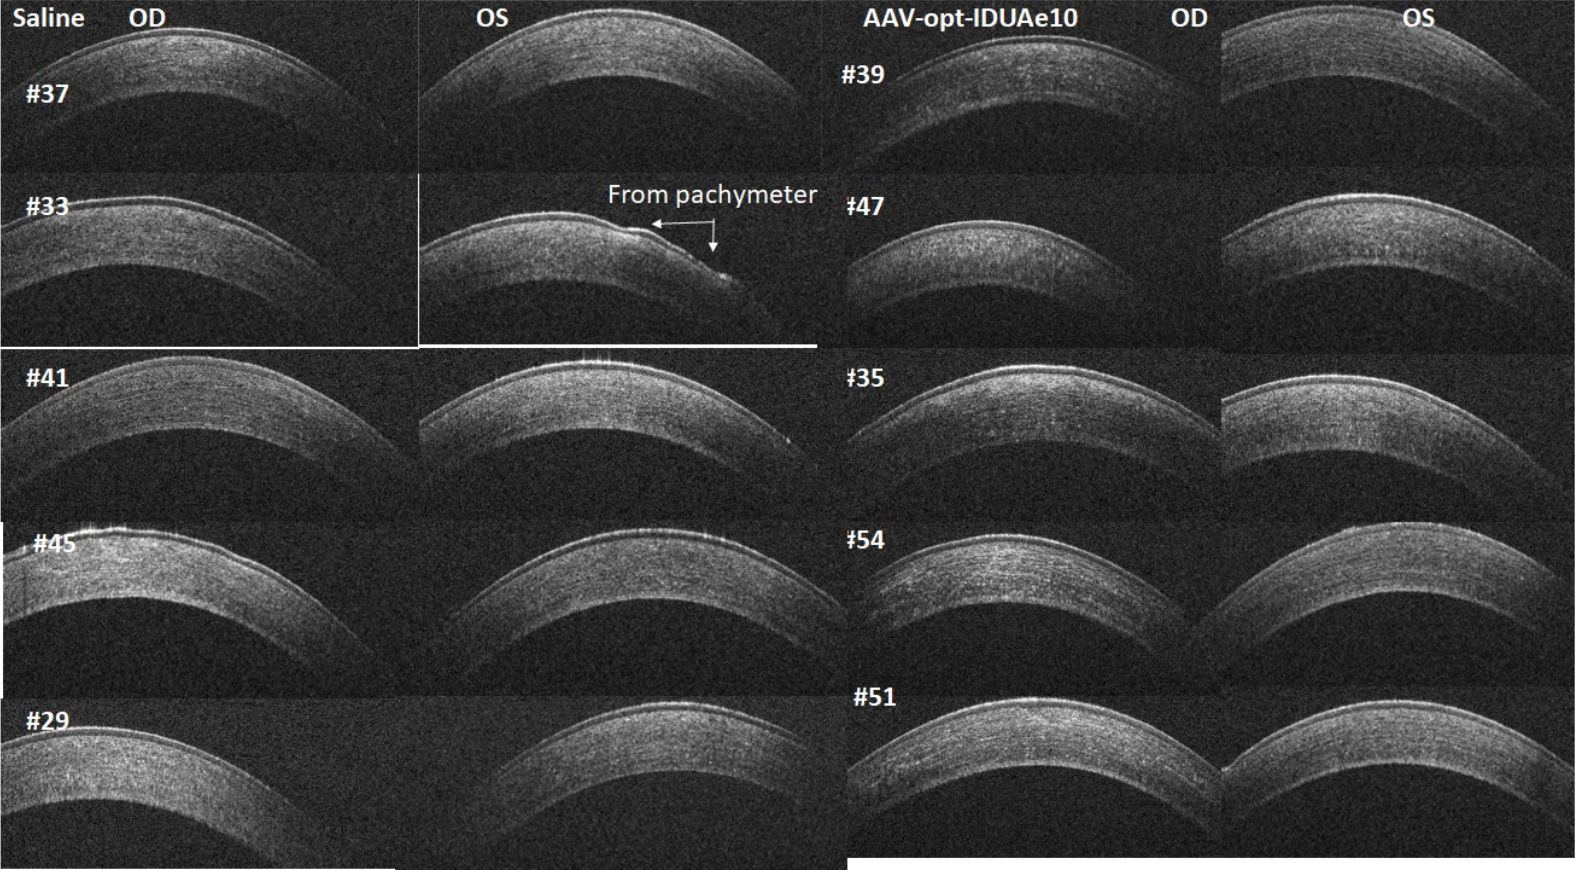

Supplement: mmc1.pdf [file mmc1.pdf]
